# Supplementary material for: Efficient biodiesel production from waste cooking oil using p-toluenesulfonic acid doped polyaniline as a catalyst
Source: Royal Society of Chemistry journal article supplement (doi:10.1039/c4ra16210b), 2015-01-01
Supplement: c4ra16210b1.pdf [file c4ra16210b1.pdf]

**Biodiesel production from waste cooking oil using p-toluene sulfonic acids doped polyaniline  
as catalyst**

Meiju Niu, Xiangjin Kong\*

School of Chemistry and Chemical Engineering, Liaocheng University, Liaocheng 252059, China

Table S1 The effect of reaction time on the yield of fatty acid methylesters

|                  |      |      |      |      |      |
|------------------|------|------|------|------|------|
| Reaction time /h | 2.0  | 2.5  | 3.0  | 3.5  | 4.0  |
| Yield/%          | 91.3 | 95.1 | 96.4 | 96.5 | 96.4 |

Reaction conditions: reaction temperature (70°C), catalyst dosage (4.0%), methanol/WCO molar ratio (7:1).

Table S2 The effect of Methanol/WCO molar ratio on the yield of fatty acid methylesters

|                          |      |      |      |      |      |
|--------------------------|------|------|------|------|------|
| Methanol/WCO molar ratio | 5:1  | 7:1  | 10:1 | 20:1 | 50:1 |
| Yield/%                  | 87.5 | 96.4 | 97.1 | 96.9 | 96.8 |

Reaction conditions: reaction temperature (70°C), catalyst dosage (4.0%), reaction time (3.0 h).

Table S3 The effect of catalyst dosage on the yield of fatty acid methylesters

|                    |      |      |      |      |      |
|--------------------|------|------|------|------|------|
| Catalyst dosage /% | 2.0  | 3.0  | 4.0  | 5.0  | 6.0  |
| Yield/%            | 88.3 | 93.3 | 97.1 | 96.8 | 96.9 |

Reaction conditions: reaction temperature (70°C), methanol/WCO molar ratio (10:1), reaction time (3.0 h).
